# Supplementary material for: Social network and dominance hierarchy analyses at Chimpanzee Sanctuary Northwest
Source: PubMed Central journal article supplement (PMC5812591; doi:10.1371/journal.pone.0191898), 2018-02-14
Supplement: pone.0191898.s001.pdf [file pone.0191898.s001.pdf]

|       |            | Reactor    |            |            |            |            |            |            |
|-------|------------|------------|------------|------------|------------|------------|------------|------------|
|       |            | <b>Ann</b> | <b>Bur</b> | <b>Fox</b> | <b>Jam</b> | <b>Jod</b> | <b>Mis</b> | <b>Neg</b> |
| Actor | <b>Ann</b> | 0          | 45         | 0          | 0          | 1567       | 2262       | 16         |
|       | <b>Bur</b> | 90         | 0          | 394        | 0          | 1197       | 0          | 0          |
|       | <b>Fox</b> | 0          | 36         | 0          | 97         | 0          | 119        | 262        |
|       | <b>Jam</b> | 0          | 0          | 169        | 0          | 127        | 0          | 349        |
|       | <b>Jod</b> | 0          | 0          | 13         | 110        | 0          | 0          | 471        |
|       | <b>Mis</b> | 130        | 652        | 232        | 335        | 2159       | 0          | 951        |
|       | <b>Neg</b> | 0          | 0          | 799        | 0          | 77         | 0          | 0          |
