# Supplementary material for: Social network and dominance hierarchy analyses at Chimpanzee Sanctuary Northwest
Source: PubMed Central journal article supplement (PMC5812591; doi:10.1371/journal.pone.0191898), 2018-02-14
Supplement: pone.0191898.s002.pdf [file pone.0191898.s002.pdf]

|       |            | Reactor    |            |            |            |            |            |            |
|-------|------------|------------|------------|------------|------------|------------|------------|------------|
|       |            | <b>Ann</b> | <b>Bur</b> | <b>Fox</b> | <b>Jam</b> | <b>Jod</b> | <b>Mis</b> | <b>Neg</b> |
| Actor | <b>Ann</b> | 0          | 1          | 0          | 1          | 1          | 1          | 0          |
|       | <b>Bur</b> | 2          | 0          | 0          | 3          | 4          | 2          | 5          |
|       | <b>Fox</b> | 0          | 2          | 0          | 2          | 0          | 1          | 0          |
|       | <b>Jam</b> | 0          | 10         | 4          | 0          | 0          | 3          | 2          |
|       | <b>Jod</b> | 2          | 1          | 0          | 0          | 0          | 1          | 1          |
|       | <b>Mis</b> | 0          | 0          | 0          | 0          | 1          | 0          | 0          |
|       | <b>Neg</b> | 0          | 3          | 1          | 0          | 0          | 1          | 0          |
