# Supplementary material for: Social network and dominance hierarchy analyses at Chimpanzee Sanctuary Northwest
Source: PubMed Central journal article supplement (PMC5812591; doi:10.1371/journal.pone.0191898), 2018-02-14
Supplement: pone.0191898.s003.pdf [file pone.0191898.s003.pdf]

|            | <b>Ann</b> | <b>Bur</b> | <b>Fox</b> | <b>Jam</b> | <b>Jod</b> | <b>Mis</b> | <b>Neg</b> |
|------------|------------|------------|------------|------------|------------|------------|------------|
| <b>Ann</b> |            |            |            |            |            |            |            |
| <b>Bur</b> | 0.62       |            |            |            |            |            |            |
| <b>Fox</b> | 0.68       | 0.88       |            |            |            |            |            |
| <b>Jam</b> | 0.65       | 0.65       | 0.76       |            |            |            |            |
| <b>Jod</b> | 0.82       | 0.91       | 0.71       | 0.59       |            |            |            |
| <b>Mis</b> | 1.00       | 0.65       | 0.59       | 0.65       | 0.65       |            |            |
| <b>Neg</b> | 0.74       | 0.41       | 0.47       | 0.74       | 0.74       | 0.79       |            |
